## Modelling of atrial fibrillation at physiologically relevant scales enabled by massive expansion of native human atrial cardiomyocytes

Harlaar N.<sup>1</sup>; Dekker SO.<sup>2</sup>; Zhang J.<sup>2</sup>; SchaliJ MJ.<sup>2</sup>; Klautz RJM<sup>3</sup>; Van Brakel TJ.<sup>3</sup>; Pijnappels DA.<sup>2</sup>; De Vries AAF<sup>2</sup>

<sup>1</sup>Leiden University Medical Center, Cardiology and Cardiothoracic Surgery, Leiden, Netherlands (The)

<sup>2</sup>Leiden University Medical Center, Experimental Cardiology, Leiden, Netherlands (The)

<sup>3</sup>Leiden University Medical Center, Cardiothoracic Surgery, Leiden, Netherlands (The)

**Funding Acknowledgements:** Type of funding sources: Public hospital(s). Main funding source(s): LUMC

**Background:** Current in vitro models of atrial fibrillation have limited translational potential due to a lack of relevant human physiology or the inability to reach the high activation frequencies present in human atrial fibrillation. Absence of relevant models is the result of a general deficit of readily available and standardized sources of well-differentiated human atrial cardiomyocytes. Therefore, we aimed to immortalize native human atrial cardiomyocytes to produce natural and standardized lines of these cells.

**Methods:** Human fetal atrial cardiomyocytes were transduced with a lentiviral vector directing myocyte-specific and doxycycline-inducible expression of simian virus 40 large T antigen. Addition of doxycycline to the culture medium pushed cardiomyocytes towards a highly proliferative phenotype (proliferation up to  $10^{12}$  cells). These cells were labelled hiAMs (human immortalised Atrial Myocytes). After differentiation upon doxycycline removal, hiAM cells were characterized using various molecular, biological and electrophysiological assays.

**Results:** Following cardiomyogenic differentiation, hiAMs no longer expressed the proliferation marker Ki67, revealed striated  $\alpha$ -actinin and troponin T staining patterns and displayed synchronous contractions. Optical voltage mapping of hiAM monolayers revealed excitable cells showing homogeneous spreading of action potentials at  $22.5 \pm 3.1$  cm/s with a mean APD80 of  $139 \pm 22$  ms. Addition of flecainide ( $10 \mu\text{M}$ ) to hiAM monolayers decreased the conduction velocity by 35% and increased the APD80 by 107%. Dofetilide ( $10 \text{ nM}$ ) addition had no effect on the conduction velocity, but did increase the APD80 by 81%. Due to their scalability, monolayers of hiAMs as big as  $10 \text{ cm}^2$  showing homogenous action potential propagation could easily be created. Following high-frequency electrical pacing, rotors could be induced with an average activation frequency of  $7.5 \pm 0.9$  Hz. Infusion of flecainide during arrhythmic activity resulted in termination of the rotor in 18 of 24 attempts (75%), whereas addition of 0.1% DMSO (vehicle control) did not result in termination in any of the attempts. Dofetilide infusion did not result in termination. However, it did lower the average activation frequency to  $2.1 \pm 0.7$  Hz.

**Conclusion:** We have generated first-of-a-kind lines of human atrial cardiomyocytes, allowing massive cell expansion under proliferation conditions and robust formation of cross-striated, contractile and excitable cardiomyocytes after differentiation. These characteristics allow, for the first time, the modelling, at a large-scale, of human atrial arrhythmias with frequencies similar to human atrial fibrillation. With the generation of hiAMs, a user-friendly, clinically-relevant and much-anticipated human atrial research model has been produced.

Abstract Figure. hiAM AF Model

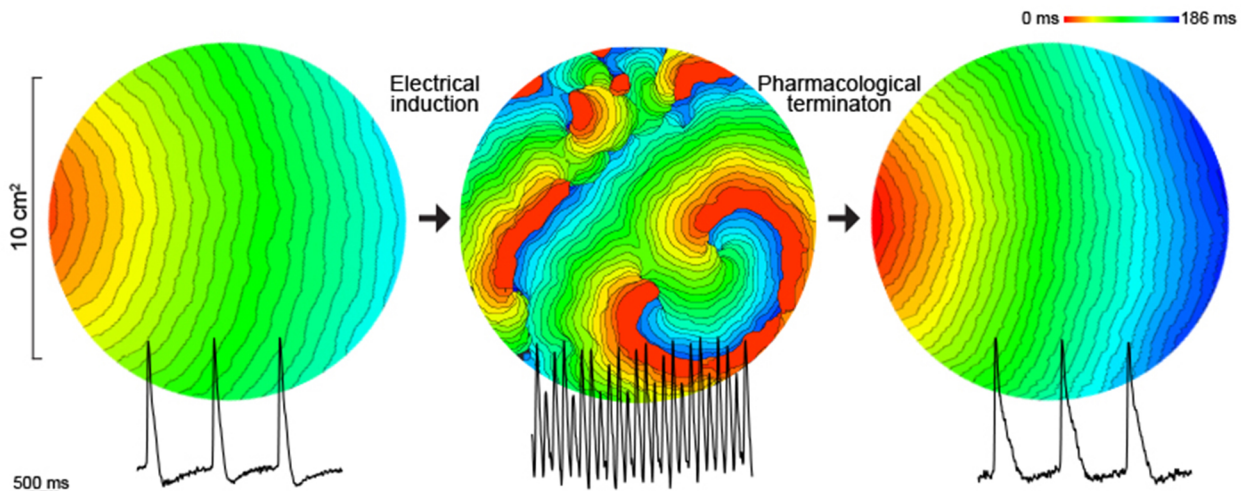

Source: http://academic.oup.com/europace/article-pdf/23/Supplement_3/euab116.553/38131407/euab116.553.pdf
